# Supplementary material
Source: PubMed Central journal article supplement (PMC4142825)
Supplement: NIHMS569452-supplement-Corrected_Table-S1.pdf [file NIHMS569452-supplement-Corrected_Table-S1.pdf]

**Table S1. Susceptibility of LQT2 frameshift and nonsense mutations to NMD**

| Exon | Reported LQT2 Mutation | Nucleotide Change    | Amino Acid Change | NMD | Reference          |
|------|------------------------|----------------------|-------------------|-----|--------------------|
| 1    | G24fs+34X              | c.73del              | p.Q25Rfs*35       | No  | 17                 |
| 2    | N33fs+25X              | c.100del             | p.A34Lfs*26       | No  | 17                 |
| 2    | C39X                   | c.117C>A             | p.C39*            | No  | 9                  |
| 2    | C44X                   | c.132C>A             | p.C44*            | No  | 23, 33             |
| 2    | E50fs+10X              |                      |                   | No  | 24                 |
| 2    | R73fs+39X              | c.219_226delinsT     | p.T74Afs*40       | No  | 17                 |
| 2    | R73fs/31               | c.221_251del         | p.T74Rfs*32       | No  | 33, 38             |
| 2    | A78fs+62X              | c.234_241del         | p.A79Dfs*63       | Yes | 17                 |
| 2    | A83fs/37               | c.234_250dup         | p.E84Lfs*38       | No  | 23, 33             |
| 2    | p.A79Dfs*63            | c.235_242del         | p.A79Dfs*63       | Yes | 34                 |
| 2    | Q81X                   | c.241C>T             | p.Q81*            | No  | 33                 |
| 2    | Q84X                   | c.250C>T             | p.Q84*            | No  | 20                 |
| 3    | V131fs/185             | c.395_456del         | p.V132Efs*179     | Yes | 38                 |
| 3    | P141fs/2               | c.422_423insC        | p.A142Gfs*3       | Yes | 33                 |
| 3    | P151fs+179X            | c.446_447insG        | p.T152Hfs*180     | Yes | 17, 24             |
| 3    | T152Pfs*14             | c.453del             | p.T152Pfs*14      | Yes | 9, 19, 27, 34, 36  |
| 3    | P151fs/179             | c.453_454insC        | p.T152Hfs*180     | Yes | 17, 22, 33, 38, 42 |
| 3    | I51fs/14               | c.453_454insCC       | p.T152Pfs*15      | Yes | 38                 |
| 4    | P168fs+4X              | c.506del             | p.A169Gfs*5       | Yes | 17                 |
| 4    | p.Glu177X              | c.529G>T             | p.E177*           | Yes | 32                 |
| 4    | R181fs/20              | c.544_545insGGTGC    | p.S182Wfs*22      | Yes | 38                 |
| 4    | S182X                  | c.545C>A             | p.S182*           | Yes | 17, 20, 38         |
| 4    | S182fs+17X             | c.548del             | p.G183Afs*18      | Yes | 17                 |
| 4    | A185fs+143X            | c.557_566delinsTTCCG | p.G186Vfs*144     | Yes | 25                 |
| 4    | G192fs+7X              | c.576del             | p.A193Pfs*8       | Yes | 25                 |
| 4    | G192fs+135X            | c.578_582del         | p.A193Gfs*137     | Yes | 15, 25, 40         |
| 4    | L200fs/144             | c.558_600dup         | p.T201Rfs*145     | Yes | 12, 33, 40         |
| 4    | T216 fs/120            |                      |                   | Yes | 40                 |
| 4    | E214X                  | c.640G>T             | p.E214*           | Yes | 17                 |
| 4    | E229X                  | c.685G>T             | p.E229*           | Yes | 3, 17, 38          |
| 4    | P241fs/89              | c.724_725insC        | p.R242Pfs*90      | Yes | 33                 |
| 4    | P245fs+114X            | c.735_736insCC       | p.G246Pfs*115     | Yes | 25                 |
| 4    | Gly246AlafsX114        | c.735del             | p.G246Afs*114     | Yes | 20                 |
| 4    | P251 fs/107            | c.754del             | p.R252Gfs*108     | Yes | 16, 40             |
| 4    | A253fs+76X             | c.759_760del         | p.H254Qfs*77      | Yes | 17                 |
| 4    | R273X                  | c.817 C>T            | p.R273*           | Yes | 9                  |
| 4    | C276fsX359             | c.823del             | p.S275Afs*85      | Yes | 39                 |
| 4    | Cys276AlafsX84         | c.826del             | p.C276Afs*84      | Yes | 20                 |
| 4    | p.D287Gfs*47           | c.853_859dup         | p.D287Gfs*47      | Yes | 34                 |
| 4    | E289X                  | c.865G>T             | p.E289*           | Yes | 20                 |
| 4    | V295fs/63              | c.885del             | p.L296Cfs*64      | Yes | 23, 33             |
| 5    | M308fs+50X             | c.925del             | p.H309Tfs*51      | Yes | 17                 |
| 5    | p.S320X                | c.959C>A             | p.S320*           | Yes | 22                 |
| 5    | R326fs/0               | c.981_991del         | p.Y327*           | Yes | 38                 |
| 5    | Q335X                  | c.1003C>T            | p.Q335*           | Yes | 30                 |
| 5    | Q335fs+23X             | c.1006del            | p.I336Sfs*24      | Yes | 17                 |
| 5    | K364fs+3X              |                      |                   | Yes | 24                 |

**Table S1. Susceptibility of LQT2 frameshift and nonsense mutations to NMD (continued)**

| Exon | Reported LQT2 Mutation | Nucleotide Change  | Amino Acid Change | NMD | Reference    |
|------|------------------------|--------------------|-------------------|-----|--------------|
| 5    | R366X                  | c.1096C>T          | p.R366*           | Yes | 17, 38       |
| 6    | S379fs+53X             | c.1138del          | p.L380Wfs*54      | Yes | 17           |
| 6    | S379fs+53X             | c.1139del          | p.L380Rfs*54      | Yes | 17           |
| 6    | K386fs+3X              |                    |                   | Yes | 24           |
| 6    | Q391X                  | c.1171C>T          | p.E391*           | Yes | 24, 25       |
| 6    | W398X                  | c.1193G>A          | p.W398*           | Yes | 17           |
| 6    | W412X                  | c.1235G>A          | p.W412*           | Yes | 25           |
| 6    | I414fs+98X             | c.1243_1256del     | p.L416Hfs*98      | Yes | 10           |
| 6    | Y420fs/12              | c.1261del          | p.T421Rfs*13      | Yes | 8, 33        |
| 6    | A422fs+10X             | c.1266del          | p.V423Sfs*11      | Yes | 17           |
| 6    | S428STOP               | c.1283C>A          | p.S428*           | Yes | 23, 29, 33   |
| 6    | E438fs+81X             | c.1316del          | p.G439Afs*82      | Yes | 17           |
| 6    | E444X                  | c.1330G>T          | p.E444*           | Yes | 20           |
| 6    | I335delTG              | c.1335_1336del     | p.C445Wfs*73      | Yes | 3            |
| 6    | Tyr447stop             | c.1341C>A          | p.Y447*           | Yes | 15, 17       |
| 6    | Q450X                  | c.1348C>T          | p.Q450*           | Yes | 17           |
| 6    | V459fs+60X             | c.1379del          | p.D460Afs*61      | Yes | 17           |
| 6    | I382delA               | c.1382del          | p.I461Tfs*60      | Yes | 9            |
| 6    | F471fs+50X             |                    |                   | Yes | 24           |
| 6    | T473fs+26X             | c.1419_1472delinsA | p.T474Pfs*27      | Yes | 17           |
| 6    | Y493X                  | c.1479C>G          | p.Y493*           | Yes | 14, 33       |
| 6    | Y493X                  | c.1479C>A          | p.Y493*           | Yes | 20           |
| 6    | W497X                  | c.1490G>A          | p.W497*           | Yes | 9, 24        |
| 7    | R537fs+24X             | c.1613_1619del     | p.K538Ifs*25      | Yes | 17, 25       |
| 7    | L539 fs/47             | c.1619_1637del     | p.D540Afs*48      | Yes | 43           |
| 7    | I631delAG              | c.1631_1632del     | p.E544Vfs*110     | Yes | 2, 9, 19, 36 |
| 7    | T556fs/7               | c.1671del          | p.F557Lfs*8       | Yes | 31, 33       |
| 7    | W563X                  | c.1688G>A          | p.W563*           | Yes | 3, 17, 34    |
| 7    | I567fs+26X             | c.1701del          | p.W568Gfs*26      | Yes | 25           |
| 7    | W568X                  | c.1704G>A          | p.W568*           | Yes | 17           |
| 7    | Met579GlyX75           | c.1735_1736del     | p.M579Gfs*75      | Yes | 11           |
| 7    | S581X                  | c.1742C>A          | p.S581*           | Yes | 17           |
| 7    | R582fs/11              | c.1746_1747insGC   | p.I583Afs*12      | Yes | 39           |
| 7    | I593X                  |                    | p.I593*           | Yes | 23           |
| 7    | Y611X                  |                    | p.Y611*           | Yes | 31, 33       |
| 7    | T634fs/78              | c.1902del          | p.N635Tfs*79      | Yes | 39           |
| 8    | L650fs/2               | c.1951_1952del     | p.M651Vfs*3       | Yes | 14, 33       |
| 8    | M651fs+68X             | c.1955_1960delinsT | p.Y652Lfs*69      | Yes | 17           |
| 8    | M651fs+X               | c.1956del          | p.Y652fs*         | Yes | 17           |
| 8    | Y652X                  |                    | p.Y652*           | Yes | 35           |
| 8    | Y667X                  | c.2001C>A          | p.Y667*           | Yes | 28           |
| 8    | E682X                  | c.2044G>T          | p.E682*           | Yes | 33           |
| 8    | Q688X                  |                    | p.Q688*           | Yes | 30           |
| 8    | Glu698stop             | c.2092G>T          | p.E698*           | Yes | 15, 40       |
| 8    | His703ProfsX11         | c.2108del          | p.H703Pfs*11      | Yes | 20           |
| 8    | p.W705X                | c.2114G>A          | p.W705*           | Yes | 22           |
| 9    | K718fs+13X             | c.2156del          | p.G719Afs*14      | Yes | 17           |

**Table S1. Susceptibility of LQT2 frameshift and nonsense mutations to NMD (continued)**

| Exon | Reported LQT2 Mutation | Nucleotide Change    | Amino Acid Change | NMD | Reference              |
|------|------------------------|----------------------|-------------------|-----|------------------------|
| 9    | Q725X                  | c.2173C>T            | p.Q725*           | Yes | 14, 33                 |
| 9    | Q738X                  | c.2212C>T            | p.Q738*           | Yes | 24                     |
| 9    | H739fs/63              | c.2218_2219insT      | p.C740Lfs*64      | Yes | 33                     |
| 9    | p.R744EfsX13           | c.2230del            | p.R744Efs*13      | Yes | 13, 42                 |
| 9    | R744stop               | c.2230C>T            | p.R744*           | Yes | 17, 23                 |
| 9    | F743fs+12X             | c.2231del            | p.R744Qfs*13      | Yes | 25                     |
| 9    | G745fs+54X             | c.2235_2245delinsTTT | p.A746Lfs*55      | Yes | 42                     |
| 9    | A753fs+6X              | c.2249_2259dup       | p.K754Afs*7       | Yes | 17                     |
| 9    | R783 fs/24             |                      |                   | Yes | 40                     |
| 9    | V796fs/22              | c.2356_2386dup       | p.A797Hfs*17      | Yes | 14, 33                 |
| 9    | I798fs/10              | c.2395del            | p.L799Wfs*11      | Yes | 33, 38                 |
| 10   | 2399delG               | c.2399del            | p.K801Rfs*9       | Yes | 3                      |
| 10   | G806fs+2X              | c.2419del            | p.E807Sfs*3       | Yes | 17                     |
| 10   | Arg823fs828            | c.2470_2471insG      | p.A824Gfs*6       | Yes | 15                     |
| 10   | K832X                  | c.2494A>T            | p.K832*           | Yes | 17, 25                 |
| 10   | W853fs+14X             |                      |                   | Yes | 24                     |
| 10   | R863X                  | c.2587C>T            | p.R863*           | Yes | 17, 20, 24, 37, 38, 40 |
| 11   | Pro872fs877            | c.2616del            | p.G873Afs*5       | Yes | 15                     |
| 11   | p.E876fs               | c.2619_2626dup       | p.E876Afs*5       | Yes | 22                     |
| 11   | E876X                  | c.2626G>T            | p.E876*           | Yes | 20, 38                 |
| 11   | G879fs+38X             | c.2637_2638del       | p.G880Lfs*39      | Yes | 42                     |
| 11   | G879fs+35X             | c.2638_2648del       | p.G880Afs*36      | Yes | 25                     |
| 11   | Q884X                  | c.2650C>T            | p.Q884*           | Yes | 3                      |
| 11   | K886fs+88X             | c.2659_2660insCAAGC  | p.R887Pfs*89      | Yes | 17                     |
| 11   | K886fs/85              | c.2660del            | p.R887Pfs*87      | Yes | 33                     |
| 11   | R892fs+79X             | c.2676_2682del       | p.R894Tfs*78      | Yes | 25                     |
| 11   | R893fs+81X             | c.2676_2680dup       | p.R894Pfs*82      | Yes | 17                     |
| 11   | p.R894fsX920           | c.2680_2681insAGGC   | p.R894Qfs*27      | Yes | 26                     |
| 12   | Q901fs/71              | c.2705del            | p.P902Qfs*72      | Yes | 38                     |
| 12   | A907fs+12X             | c.2718_2721dup       | p.L908Gfs*13      | Yes | 17                     |
| 12   | G909fs+58X             | c.2729_2744del       | p.P910Qfs*59      | Yes | 17                     |
| 12   | P910fs/16              | c.2728_2762del       | p.R911Afs*17      | Yes | 38                     |
| 12   | L911fs+6X              |                      |                   | Yes | 24                     |
| 12   | R912fs+55X             | c.2736_2751del       | p.A913Vfs*56      | Yes | 17                     |
| 12   | R912fs+63X             |                      |                   | Yes | 24                     |
| 12   | G914fs+60X             | c.2734_2738dup       | p.A915Rfs*61      | Yes | 17                     |
| 12   | p.A915fs               | c.2742_2775del       | p.A915Rfs*48      | Yes | 22                     |
| 12   | R920fs/51              | c.2762del            | p.G921Afs*53      | Yes | 23, 33, 38             |
| 12   | R922fs+50X             | c.2766del            | p.P923Rfs*51      | Yes | 38                     |
| 12   | P923RfsX51             | c.2768del            | p.P923Rfs*51      | Yes | 13, 18                 |
| 12   | Gly925ValfsX49         | c.2774_2775delinsT   | p.G925Vfs*49      | Yes | 20                     |
| 12   | G925fs/13              | c.2775_2776insG      | p.P926Afs*14      | Yes | 22, 33                 |
| 12   | fsGly925               | c.2775del            | p.P926Rfs*48      | Yes | 23, 25                 |
| 12   | W927X                  | c.2780G>A            | p.W927*           | Yes | 17                     |
| 12   | W927X                  | c.2781G>A            | p.W927*           | Yes | 25                     |
| 12   | G928fs+44X             | c.2784del            | p.E929Rfs*45      | Yes | 17                     |
| 12   | G928fs/10              | c.2785_2786insG      | p.E929Rfs*11      | Yes | 38                     |

**Table S1. Susceptibility of LQT2 frameshift and nonsense mutations to NMD (continued)**

| Exon | Reported LQT2 Mutation | Nucleotide Change    | Amino Acid Change | NMD | Reference         |
|------|------------------------|----------------------|-------------------|-----|-------------------|
| 12   | P964fs+8X              | c.2892del            | p.G965Efs*9       | Yes | 17, 20            |
| 12   | P964fs+153X            | c.2892_2893insC      | p.G965Rfs*154     | No  | 17                |
| 12   | G965X                  | c.2893G>T            | p.G965*           | Yes | 6                 |
| 12   | G965+148X              | c.2895_2905del       | p.E966Wfs*149     | No  | 25                |
| 12   | 2900_2901insC          | c.2900_2901insC      | p.P968Afs*151     | No  | 3                 |
| 12   | P968fs/4               | c.2906del            | p.G969Vfs*5       | Yes | 23, 33            |
| 12   | P972fs+1X              | c.2918_2919insCC     | p.L973Pfs*2       | Yes | 17                |
| 12   | P986fs/130             | c.2959_2960del       | p.L987Vfs*131     | No  | 17, 33, 34        |
| 12   | Ser988ProfsX71         | c.2956_2960dup       | p.S988Pfs*71      | Yes | 20                |
| 13   | F1000fs+117X           | c.3001_3002insT      | p.W1001Lfs*118    | No  | 17                |
| 13   | W1001stop              | c.3002G>A            | p.W1001*          | Yes | 7, 17, 20, 23     |
| 13   | R1005fs/50             | c.3014del            | p.G1006Afs*51     | Yes | 38                |
| 13   | R1007fs+1056X          | c.3019del            | p.R1007Afs*50     | Yes | 42                |
| 13   | Q1010fs+45X            | c.3032del            | p.E1011Gfs*46     | Yes | 17                |
| 13   | R1014PfsX39            | c.3036_3048del       | p.R1014Pfs*39     | Yes | 6                 |
| 13   | Arg1014ProfsX101       | c.3039_3049del       | p.R1014Pfs*101    | No  | 20                |
| 13   | R1014X                 | c.3040C>T            | p.R1014*          | Yes | 17, 20, 33, 38    |
| 13   | C1015X                 | c.3045C>A            | p.C1015*          | Yes | 25                |
| 13   | Ser1021AlafsX36        | c.3060del            | p.S1021Afs*36     | Yes | 20                |
| 13   | L1021fs+34X            | c.3065del            | p.L1022Pfs*35     | Yes | 41, 42            |
| 13   | S1029fs+27X            | c.3086_3087dup       | p.P1030Afs*28     | Yes | 17                |
| 13   | G1031fs+87X            | c.3090_3093dup       | p.R1032Gfs*88     | No  | 17                |
| 13   | G1031fs/24             | c.3094del            | p.R1032Gfs*25     | Yes | 17, 33            |
| 13   | p.R1032fs              | c.3096_3112del       | p.R1033Gfs*80     | No  | 22                |
| 13   | R1032fs+85X            | c.3097_3098insC      | p.R1033Pfs*86     | No  | 17                |
| 13   | R1033fs+79X            | c.3093_3106del       | p.P1034Gfs*80     | No  | 17                |
| 13   | R1033fs/23             | c.3098_3099insCG     | p.P1034Gfs*24     | Yes | 38                |
| 13   | P1034fs+21X            | c.3099del            | p.R1035Gfs*22     | Yes | 17, 20, 25        |
| 13   | R1033fs+79X            | c.3099_3112del       | p.P1034Gfs*80     | No  | 17                |
| 13   | R1033fs+23X            | c.3099_3100insCG     | p.P1034Rfs*24     | Yes | 17                |
| 13   | R1033fs+82X            | c.3100_3107delinsGGC | p.P1034Gfs*83     | No  | 17                |
| 13   | R1033fs/81             | c.3101_3108del       | p.P1034Rfs*82     | No  | 17, 38            |
| 13   | P1034fs+18X            | c.3102_3111del       | p.R1035Wfs*19     | Yes | 17                |
| 13   | P1034fs+21X            | c.3103del            | p.R1035Gfs*22     | Yes | 17, 24, 38        |
| 13   | P1034fs+83X            | c.3103_3104insC      | p.R1035Pfs*84     | No  | 17                |
| 13   | G1036AfsX21            | c.3107del            | p.G1036Afs*21     | Yes | 20                |
| 13   | G1036fs/82             | c.3107_3108insG      | p.D1037Rfs*82     | No  | 4, 17, 21, 33, 34 |
| 13   | D1037fs+23X            | c.3099_3112dup       | p.V1038Gfs*24     | Yes | 17                |
| 13   | p.D1037fs              | c.3106_3109dup       | p.D1037Gfs*83     | No  | 22                |
| 13   | V1038fs/80             | c.3106_3112dup       | p.V1038Gfs*83     | No  | 38                |
| 13   | V1038AfsX21            | c.3107_3111dup       | p.V1038Afs*21     | Yes | 6                 |
| 14   | R1051fs+4X             | c.3154del            | p.L1052Wfs*5      | Yes | 25                |
| 14   | E1053X                 | c.3157G>T            | p.E1053*          | Yes | 38                |
| 14   | 3160insA               | c.3159_3160insA      | p.T1054Nfs*65     | No  | 9                 |
| 14   | p.T1054fsX2            | c.3161del            | p.R1055Gfs*2      | Yes | 1                 |
| 14   | L1056fs/61             | c.3167_3168insT      | p.S1057Efs*62     | No  | 38                |
| 14   | S1057fs/60             | c.3172_3173insG      | p.A1058Gfs*61     | No  | 38                |

**Table S1. Susceptibility of LQT2 frameshift and nonsense mutations to NMD (continued)**

| <b>Exon</b> | <b>Reported LQT2 Mutation</b> | <b>Nucleotide Change</b> | <b>Amino Acid Change</b> | <b>NMD</b> | <b>Reference</b> |
|-------------|-------------------------------|--------------------------|--------------------------|------------|------------------|
| 14          | L1064fsX1068                  |                          |                          | Yes        | 7                |
| 14          | Q1070X                        | c.3208C>T                | p.Q1070*                 | Yes        | 5                |
| 14          | A1077fs+X                     | c.3234del                | p.Y1078*                 | Yes        | 17               |
| 14          | G1085fs+32X                   | c.3255_3256insG          | p.P1086Afs*33            | No         | 17               |
| 14          | P1101fs                       | c.3303_3304insC          | p.T1102Hfs*17            | No         | 25, 33           |
| 15          | T1133fs+135X                  | c.3397_3398del           | p.R1134Tfs*135           | No         | 25               |
| 15          | R1135fs+134X                  | c.3403_3406dup           | p.L1136Pfs*135           | No         | 17               |
| 15          | G1158fs+110X                  | c.3470_3471insC          | p.S1159Qfs*111           | No         | 17               |

## References

1. Andrsova, I., et al., 2012. Clinical characteristics of 30 Czech families with long QT syndrome and KCNQ1 and KCNH2 gene mutations: importance of exercise testing. *J Electrocardiol* 45, 746–751.
2. Behr, E.R., et al., 2008. Sudden arrhythmic death syndrome: familial evaluation identifies inheritable heart disease in the majority of families. *Eur. Heart J.* 29, 1670–1680.
3. Berge, K.E., et al., 2008. Molecular genetic analysis of long QT syndrome in Norway indicating a high prevalence of heterozygous mutation carriers. *Scand. J. Clin. Lab. Invest.* 68, 362–368.
4. Berthet, M., et al., 1999. C-terminal HERG mutations: the role of hypokalemia and a KCNQ1-associated mutation in cardiac event occurrence. *Circulation* 99, 1464–1470.
5. Bhuiyan, Z.A., et al., 2008. Recurrent intrauterine fetal loss due to near absence of HERG: clinical and functional characterization of a homozygous nonsense HERG Q1070X mutation. *Heart Rhythm* 5, 553–561.
6. Choe, C.-U., et al., 2006. C-terminal HERG (LQT2) mutations disrupt IKr channel regulation through 14-3-3epsilon. *Hum. Mol. Genet.* 15, 2888–2902.
7. Cuneo, B.F., et al., 2013. In utero diagnosis of long QT syndrome by magnetocardiography. *Circulation* 128, 2183–2191.
8. Curran, M.E., Splawski, I., Timothy, K.W., Vincent, G.M., Green, E.D., Keating, M.T., 1995. A molecular basis for cardiac arrhythmia: HERG mutations cause long QT syndrome. *Cell* 80, 795–803.
9. Fodstad, H., et al., 2004. Four potassium channel mutations account for 73% of the genetic spectrum underlying long-QT syndrome (LQTS) and provide evidence for a strong founder effect in Finland. *Ann. Med.* 36 Suppl 1, 53–63.
10. Gao, Y., Zhang, P., Li, X.-B., Wu, C.-C., and Guo, J.-H., 2013. A novel deletion-frameshift mutation in the S1 region of HERG gene in a Chinese family with long QT syndrome. *Chin. Med. J.* 126, 3093–3096.
11. Hata, Y., et al., 2014. Identification and characterization of a novel genetic mutation with prolonged QT syndrome in an unexplained postoperative death. *Int. J. Legal Med.* 128, 105–115.
12. Hoorntje, T., et al., 1999. Homozygous premature truncation of the HERG protein : the human HERG knockout. *Circulation* 100, 1264–1267.
13. Hsueh, C.-H., Chen, W.-P., Lin, J.-L., Liu, Y.-B., Su, M.-J., Lai, L.-P., 2008. Functional studies on three novel KCNH2 mutations in Taiwan: identification of distinct mechanisms of channel defect and dissociation between glycosylation defect and assembly defect. *Biochem. Biophys. Res. Commun.* 373, 572–578.
14. Itoh, T., et al., 1998. Genomic organization and mutational analysis of HERG, a gene responsible for familial long QT syndrome. *Hum Genet* 102, 435–439.
15. Jongbloed, R., Marcelis, C., Velter, C., Doevendans, P., Geraedts, J., Smeets, H., 2002. DHPLC analysis of potassium ion channel genes in congenital long QT syndrome. *Hum. Mutat.* 20, 382–391.
16. Kapa, S., et al., 2009. Genetic testing for long-QT syndrome: distinguishing pathogenic mutations from benign variants. *Circulation* 120, 1752–1760.
17. Kapplinger, J.D., et al., 2009. Spectrum and prevalence of mutations from the first 2,500 consecutive unrelated patients referred for the FAMILION long QT syndrome genetic test. *Heart Rhythm* 6, 1297–1303

18. Lai, L.-P., et al., 2005. Denaturing high-performance liquid chromatography screening of the long QT syndrome-related cardiac sodium and potassium channel genes and identification of novel mutations and single nucleotide polymorphisms. *J. Hum. Genet.* 50, 490–496.
19. Laitinen, P., et al., 2000. Survey of the coding region of the HERG gene in long QT syndrome reveals six novel mutations and an amino acid polymorphism with possible phenotypic effects. *Hum. Mutat.* 15, 580–581
20. Lieve, K.V., et al., 2013. Results of genetic testing in 855 consecutive unrelated patients referred for long QT syndrome in a clinical laboratory. *Genet Test Mol Biomarkers* 17, 553–561.
21. Lupoglazoff, J.M., et al., 2001. Notched T waves on Holter recordings enhance detection of patients with LQT2 (HERG) mutations. *Circulation* 103, 1095–1101.
22. Millat, G., et al., 2006. Spectrum of pathogenic mutations and associated polymorphisms in a cohort of 44 unrelated patients with long QT syndrome. *Clin. Genet.* 70, 214–227.
23. Moss, A.J., et al., 2002. Increased risk of arrhythmic events in long-QT syndrome with mutations in the pore region of the human ether-a-go-go-related gene potassium channel. *Circulation* 105, 794–799.
24. Nagaoka, I., et al., 2008. Mutation site dependent variability of cardiac events in Japanese LQT2 form of congenital long-QT syndrome. *Circ. J.* 72, 694–699.
25. Napolitano, C., et al., 2005. Genetic testing in the long QT syndrome: development and validation of an efficient approach to genotyping in clinical practice. *JAMA* 294, 2975–2980.
26. Nishimoto, O., et al., 2012. Peripartum cardiomyopathy presenting with syncope due to Torsades de pointes: a case of long QT syndrome with a novel KCNH2 mutation. *Intern. Med.* 51, 461–464.
27. Park, J.K., Oh, Y.-S., Choi, J.-H., Yoon, S.K. 2013. Single nucleotide deletion mutation of KCNH2 gene is responsible for LQT syndrome in a 3-generation Korean family. *J. Korean Med. Sci.* 28, 1388–1393.
28. Paulussen, A., et al., 2000. Analysis of the human KCNH2(HERG) gene: identification and characterization of a novel mutation Y667X associated with long QT syndrome and a non-pathological 9 bp insertion. *Hum. Mutat.* 15, 483.
29. Priori, S.G., Napolitano, C., Schwartz, P.J., 1999. Low penetrance in the long-QT syndrome: clinical impact. *Circulation* 99, 529–533.
30. Shimizu, W., et al., 2009. Genotype-phenotype aspects of type 2 long QT syndrome. *J. Am. Coll. Cardiol.* 54, 2052–2062.
31. Schulze-Bahr, E., Haverkamp, W., Funke, H., 1995. The long-QT syndrome. *N. Engl. J. Med.* 333, 1783–1784.
32. Silva, D., Miltenberger-Miltenyi, G., Correia, M.J., Diogo, A.N., 2013. Novel mutation in the KCNH2 gene associated with long QT syndrome. *Rev Port Cardiol* 32, 163–164.
33. Splawski, I., et al., 2000. Spectrum of mutations in long-QT syndrome genes. KVLQT1, HERG, SCN5A, KCNE1, and KCNE2. *Circulation* 102, 1178–1185.
34. Stattin, E.-L., et al., 2012. Founder mutations characterise the mutation panorama in 200 Swedish index cases referred for Long QT syndrome genetic testing. *BMC Cardiovasc Disord* 12, 95
35. Sun, Y., et al., 2009. A novel nonsense mutation Y652X in the S6/pore region of human ether-go-go gene found in a long QT syndrome family. *Scand. Cardiovasc. J.* 43, 181–186.
36. Swan, H., Viitasalo, M., Piippo, K., Laitinen, P., Kontula, K., Toivonen, L., 1999. Sinus node function and ventricular repolarization during exercise stress test in long QT syndrome

- patients with KvLQT1 and HERG potassium channel defects. *J. Am. Coll. Cardiol.* 34, 823–829
37. Teng, S., et al., 2004. Clinical and electrophysiological characterization of a novel mutation R863X in HERG C-terminus associated with long QT syndrome. *J. Mol. Med.* 82, 189–196
  38. Tester, D.J., Will, M.L., Haglund, C.M., Ackerman, M.J., 2005. Compendium of cardiac channel mutations in 541 consecutive unrelated patients referred for long QT syndrome genetic testing. *Heart Rhythm* 2, 507–517.
  39. Tester, D.J., Medeiros-Domingo, A., Will, M.L., Haglund, C.M., Ackerman, M.J., 2012. Cardiac channel molecular autopsy: insights from 173 consecutive cases of autopsy-negative sudden unexplained death referred for postmortem genetic testing. *Mayo Clin. Proc.* 87, 524–539.
  40. Van Langen, I.M., Birnie, E., Alders, M., Jongbloed, R.J., Le Marec, H., Wilde, A.A.M., 2003. The use of genotype-phenotype correlations in mutation analysis for the long QT syndrome. *J. Med. Genet.* 40, 141–145.
  41. Yoshinaga, M., et al., 2013. Electrocardiographic screening of 1-month-old infants for identifying prolonged QT intervals. *Circ Arrhythm Electrophysiol* 6, 932–938.
  42. Yoshinaga, M., et al., 2013. Genetic Characteristics of Children and Adolescents with Long QT Syndrome Diagnosed by School-Based Electrocardiographic Screening Programs. *Circ Arrhythm Electrophysiol.* Epub ahead of print.
  43. Zhang, A., et al., 2013. L539 fs/47, a truncated mutation of human ether-a-go-go-related gene (hERG), decreases hERG ion channel currents in HEK 293 cells. *Clin. Exp. Pharmacol. Physiol.* 40, 28–36.
